# Supplementary material
Source: PubMed Central journal article supplement (PMC9216338)
Supplement: NIHMS1634719-supplement-9.pdf [file NIHMS1634719-supplement-9.pdf]

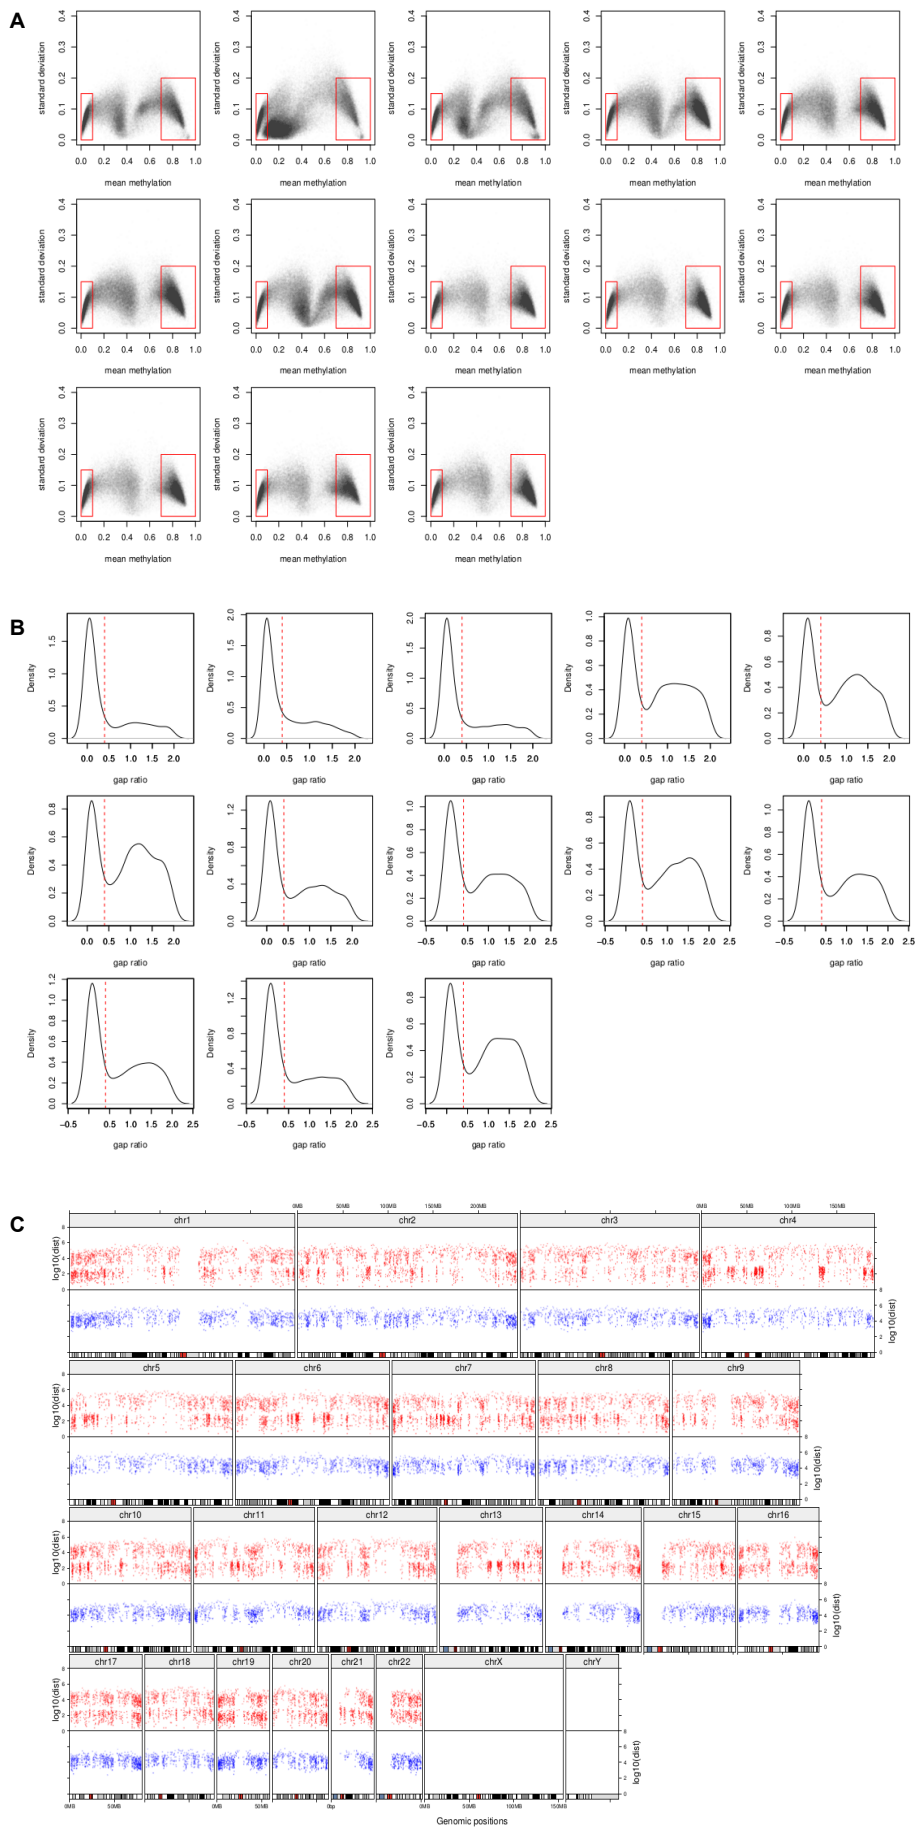

**Methods Figure 1.** **A.** Distribution of both the mean (x-axes) and the standard deviation (y-axes) of methylation in the segments. **B.** Distribution of gap ratios for all samples. From left to right and top to bottom samples are NP1 to NP6 and PDAC1 to PDAC7. Dotted lines indicates selected cutoff. **A,B.** From left to right and top to bottom samples are NP1 to NP6 and PDAC1 to PDAC7. **C.** Representative rainfall plot after cluster merging (red track: before merging, blue track: after merging).
